# Supplementary material for: Adjoint-optimized nanoscale light extractor for nitrogen-vacancy centers in diamond
Source: publisher site journal article supplement (doi:10.1515/nanoph-2020-0387), 2020-11-16
Supplement: Supplementary file 1 [file j_nanoph-2020-0387_suppl.pdf]

Supplemental information:

**Adjoint-optimized nanoscale light extractor for nitrogen-vacancy centers in diamond**

Raymond A. Wambold<sup>1</sup>, Zhaoning Yu<sup>1,2</sup>, Yuzhe Xiao<sup>1</sup>, Benjamin Bachman<sup>3</sup>, Gabriel Jaffe<sup>2</sup>, Shimon Kolkowitz<sup>2</sup>, Jennifer T. Choy<sup>4,1,5</sup>, Mark A. Eriksson<sup>2</sup>, Robert J. Hamers<sup>3</sup>, Mikhail A. Kats<sup>1,2,5</sup>

1. Department of Electrical and Computer Engineering, University of Wisconsin – Madison

2. Department of Physics, University of Wisconsin – Madison

3. Department of Chemistry, University of Wisconsin – Madison

4. Department of Engineering Physics, University of Wisconsin – Madison

5. Department of Materials Science and Engineering, University of Wisconsin - Madison

**S1. Near-field comparison with and without the NLE**

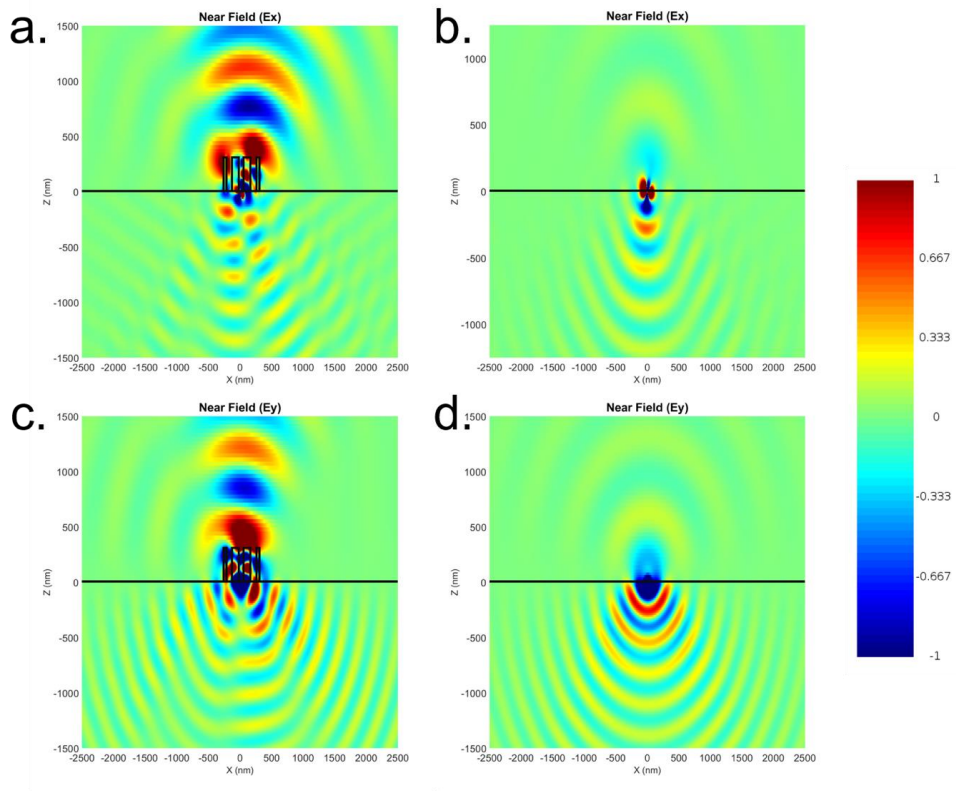

**Figure S1.** A snapshot of the electric fields in the vicinity of the NV center taken along a slice in the XZ plane at  $y = 0$  (the center of the device and the y-coordinate of the NV), at a wavelength of 675 nm. Here we directly compare the X components of the electric field for the dipole in the XZ plane (a) with and (b) without the NLE, and the Y components of the electric field for the dipole in the XY plane (c) with and (d) without the NLE. The NLE is outlined in black for reference.

## S2. FoM vs. the NLE angle with respect to the NV orientation

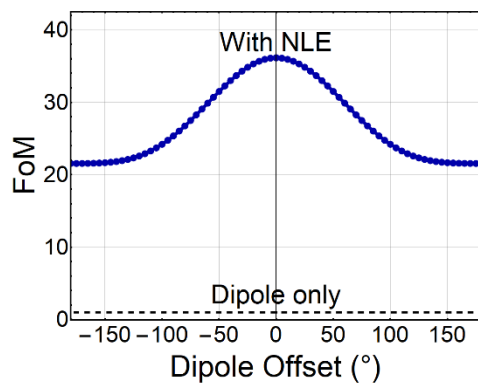

**Figure S2.** The full rotational robustness of the NLE demonstrated by rotating the NV emitter a full 360° around the Z axis.

### S3. Far-field $|E|^2$ plots for select wavelengths across 635 – 800 nm

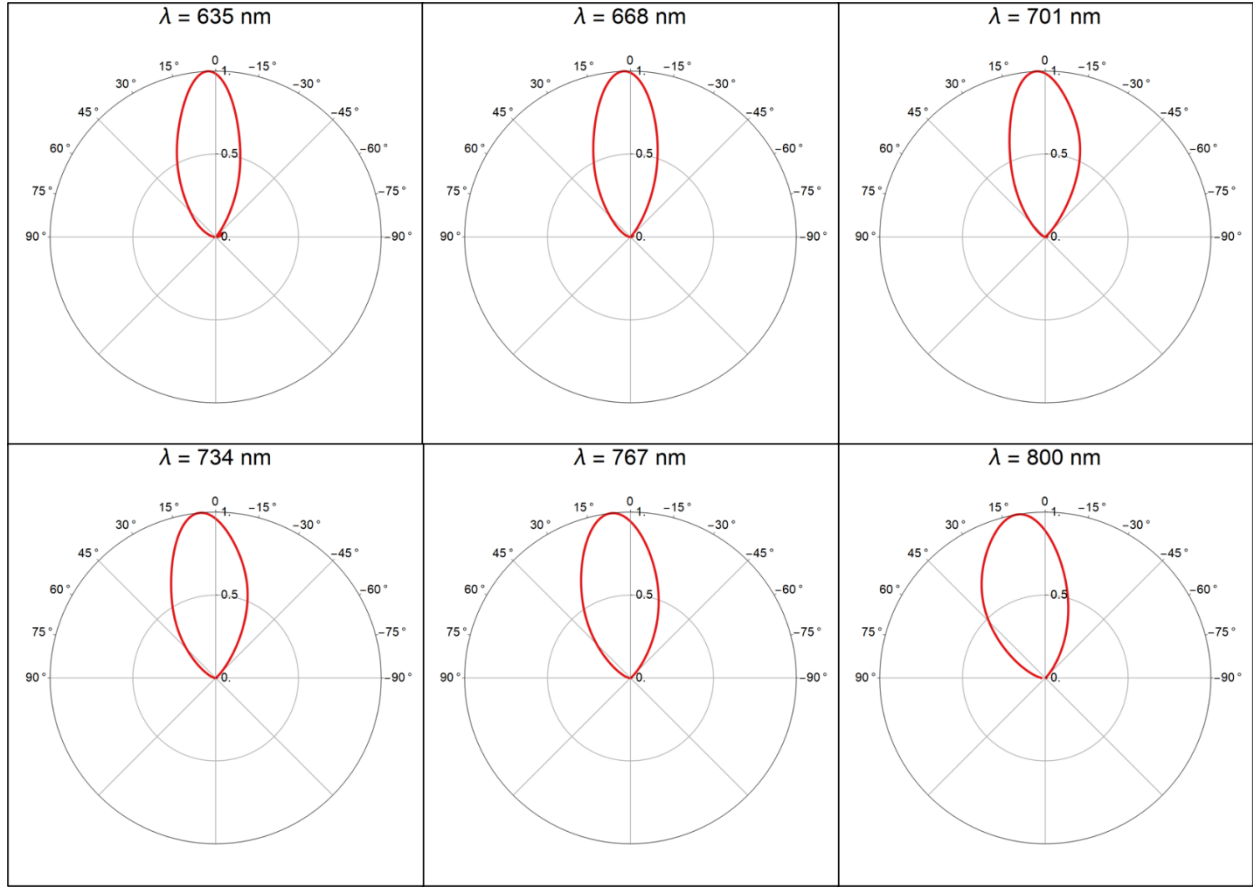

**Figure S3.** To make sure the beaming capabilities of our device are maintained over the full 635 – 800 nm spectrum we simulated and calculated the far-field  $|E|^2$  intensities for multiple other wavelengths besides the one presented in Figure 3(d). Here we plot slices of the field profiles at an azimuthal angle of  $0^\circ$  and along a polar angle of  $\pm 90^\circ$  for wavelengths 635, 668, 701, 734, 767, and 800 nm. The far-fields are normalized to the peak intensity over the full hemispherical projection ( $-90^\circ \leq \theta \leq 90^\circ$  and  $0 \leq \phi \leq 360^\circ$ ) so the peaks in some plots occur at another azimuthal angle. The peak intensity always stays within  $\pm 15^\circ$  of the normal with only minor variations between the different wavelengths.

#### S4. Collection efficiency, reflection, and absorption

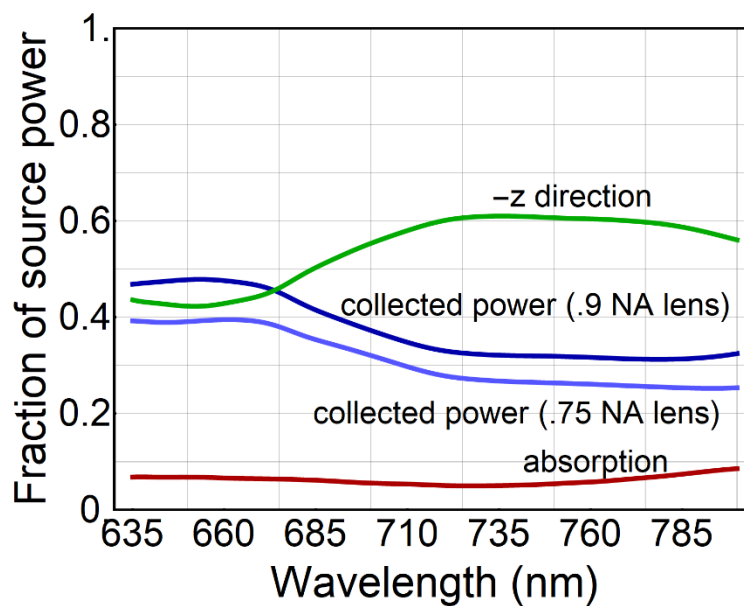

**Figure S4.** Breakdown of light emitted by the NV center in the presence of the NLE. The collection efficiency is defined as the fraction of emitted power can be collected by a lens with a specific NA. The power recorded in the -z direction is defined as the power flow downwards through a plane placed 100 nm below the NV center and diamond interface. The absorption is calculated as  $1 - (\text{power going towards } +z) - (\text{power going towards } -z)$ . The power flow is normalized to the full, Purcell-enhanced output power of the dipole source and averaged between the two dipole orientations.
